# Supplementary material for: Activation of NLR-Mediated Autoimmunity in Arabidopsis Early in Short Days 4 Mutant
Source: PubMed Central journal article supplement (PMC9174647; doi:10.3389/fpls.2022.881212), 2022-05-25
Supplement: Data_Sheet_1.pdf [file Data_Sheet_1.pdf]

## Supplemental data

**Table 1. Mutants used in this study.**

| Mutants                | Description of mutants                          | Purpose                                                          |
|------------------------|-------------------------------------------------|------------------------------------------------------------------|
| <i>line1-12/esd4-3</i> | A 49bp deletion in the last exon of <i>ESD4</i> | An <i>esd4</i> allele with loss-function mutation of <i>ESD4</i> |
| <i>esd4-4</i>          | A 2772bp deletion in <i>ESD4</i> gene           | An <i>esd4</i> allele with loss-function mutation of <i>ESD4</i> |
| <i>fmo1</i>            | A Salk T-DNA insertion in <i>FMO1</i> gene      | generating <i>fmo1esd4</i> double mutant                         |
| <i>fmo1esd4</i>        | Knock out <i>ESD4</i> in <i>fmo1</i> background | Using to reveal <i>ESD4</i> regulating pathway in plant immunity |
| <i>eds1-2</i>          | A 939bp deletion of <i>EDS1</i> gene            | Using to generate <i>eds1esd4</i> double mutant                  |
| <i>eds1-2esd4-3</i>    | <i>eds1-2</i> crossed with <i>esd4-3</i>        | Using to reveal <i>ESD4</i> regulating pathway in plant immunity |

**Table 2. Primers used in this study.**

Primers for vector constructing

| primer name | primer sequence (5'-->3')                   |
|-------------|---------------------------------------------|
| 4g15880-BsF | ATATATGGTCTCGATTGAGATTCATGCTCCTAGTAGGTT     |
| 4g15880-F0  | TGAGATTCATGCTCCTAGTAGGTTTTAGAGCTAGAAATAGC   |
| 4g15880-R0  | AACCAGAATCTCTTTAGCTGTTCAATCTCTTAGTCGACTCTAC |
| 4g15880-BsR | ATTATTGGTCTCGAAACCAGAATCTCTTTAGCTGTTC       |
| 4g23130-BsF | ATATATGGTCTCGATTGTCCTTCTAACCTTCTTCATGTT     |
| 4g23130-F0  | TGTCCTTCTAACCTTCTTCATGTTTTAGAGCTAGAAAATAGC  |
| 4g23320-R0  | AACCGCTGCAATCTATCAGCTACAATCTCTTAGTCGACTCTAC |
| 4g23320-BsR | ATTATTGGTCTCGAAACCGCTGCAATCTATCAGCTAC       |

Primers for map-based cloning

| primer name | primer sequence (5'-->3') |
|-------------|---------------------------|
|-------------|---------------------------|

|          |                          |
|----------|--------------------------|
| T4C9-F   | CAAAGGTTTCGTGTCGGAGC     |
| T4C9-R   | CGTTGACGGGATACTCGGTG     |
| F9F13-F  | CTTGGTTAGTGACCAAGCCTTA   |
| F9F13-R  | GATGAATCGTGGATAACATTCAGC |
| FCA2-F   | GTTGATGGAACCATCCGAGGATCC |
| FCA2-R   | GGAGCATGGTGCACCTCCTCTAG  |
| T15B16-F | CAAATTTCACTGATTCATCGC    |
| T15B16-R | TGATTGTTTCGATTTTGTAGTTG  |
| F8D20-F  | TTGATCTGAATAGGTCCCCC     |
| F8D20-R  | ACTGTTGCGATAATGCAGTG     |
| F13M23-F | TGATCCCAAGGCCAGCTTAG     |
| F13M23-R | ACTGAGAACTCAGATCG        |

Primers for genotyping and sanger sequencing

| <b>mutant</b>   | <b>primer name</b> | <b>primer sequence (5'--&gt;3')</b> |
|-----------------|--------------------|-------------------------------------|
| <i>esd4-3</i>   | esd4-3-F           | cagGTATGACTGTGGAATG                 |
|                 | esd4-3-R           | GAGGAAAATATATCGAACCG                |
| <i>esd4-4/5</i> | chesd4-F           | CACCGTATTTCCAAGCTTCC                |
|                 | chesd4-R           | CTTCAGCTAGACTAACCAAC                |
|                 | chesd4-HR          | GCTTTCTATAAGCTTCGAGG                |
| <i>eds1-2</i>   | eds1-2-g-F         | ACAAGCCAAAGTGTC AAGCC               |
|                 | eds1-2-g-R         | CAAGCATCCCTTCTAATGTC                |
| <i>line1</i>    | line1-1-F          | CGGCTTGCTGAATAATCAC                 |
|                 | line1-1-R          | GCTTAGAATACGAAACAGAGG               |
|                 | line1-2-F          | CTGATCGTCCAACGATGTC                 |
|                 | line1-2-R          | CTGAGTATCCAAGCATGCAC                |

Primers for real time qRT-PCR

| <b>primer name</b> | <b>primer sequence (5'--&gt;3')</b> |
|--------------------|-------------------------------------|
|--------------------|-------------------------------------|

|             |                           |
|-------------|---------------------------|
| EDS1-RT-F   | GATTATTCAGGTGATCGAGC      |
| EDS1-RT-R   | AATCTGCGGTATCGAGTTGC      |
| PR1 F-2     | AGGCAACTGCAGACTCATAC      |
| PR1 R-2     | TTGTTACACCTCACTTTGGC      |
| PR2-A       | GCTTCCTTCTTCAACCACACAGC   |
| PR2-B       | CGTTGATGTACCGGAATCTGAC    |
| EDS5-RT-F   | GCCAAACAGGACAAGAAAGAAG    |
| EDS5-RT-R   | GCCGAAACAATCTGTGAAGC      |
| FMO1-RT-F   | GGAGATATTCAGTGGCATGC      |
| FMO1-RT-R   | TTTGGTTAGGCCTATCATGG      |
| ALD1-RT-F   | TTCCCAAGGCTAGTTTGGAC      |
| ALD1-RT-R   | GCCTAAGAGTAGCTGAAGACG     |
| PBS3-RT-F   | CTAAGTTCTGGA ACTTCTGG     |
| PBS3-RT-R   | CATGACTGAAGCAAAGATGG      |
| PAD4-RT-F   | CTCTTTCTTCAGTTAAAGATCAAGG |
| PAD4-RT-R   | TAGTGTCCGTACCTCTGATG      |
| ADR1-RT-F   | CTTCATACAGGGGAAATGGA      |
| ADR1-RT-R   | CAGGAGACATGCCATTGTTG      |
| SARD1-RT-F  | CCCTTGCCTCGCCAATTTC       |
| SARD1-RT-R  | CAAGTGGATTGTTGTCCACG      |
| CBP60g-RT-F | GAAGAATTGTCCGAGAGGAG      |
| CBP60g-RT-R | GTGAAATCAGCGTTCAGCG       |
